# Supplementary material
Source: publisher site journal article supplement (https://www.dovepress.com/article/330842)
Supplement: Supplementary file 1 [file get_supplementary_file.php]

**Appendix 1 Beliefs about Medicines Questionnaire-Specific**

| **medication necessity** |
| --- |
| My health, at present, depends on EEN |
| My life would be impossible without EEN |
| Without EEN I would be very ill |
| My health in the future will depend on EEN |
| EEN protects me from feeling worse |
| **medication concern** |
| Having to EEN treatment worries me |
| I sometimes worry about long-term effects of EEN |
| EEN treatment are a mystery to me |
| EEN treatment disrupts my life |
| I sometimes worry about becoming too dependent on EEN |
